# Supplementary material for: Suicide mortality among youth in southern Brazil: a spatiotemporal evaluation of socioeconomic vulnerability
Source: PubMed Central journal article supplement — Braz J Psychiatry. 2019 Aug 19;42(1):46–53. doi: 10.1590/1516-4446-2018-0352 (PMC6986484; doi:10.1590/1516-4446-2018-0352), 2019-08-19
Supplement: bjp-42-01-46-s001.pdf [file bjp-42-01-46-s001.pdf]

## Online-Only Supplementary Material

**Figure S1** Map of the state of Paraná showing subregions and municipalities

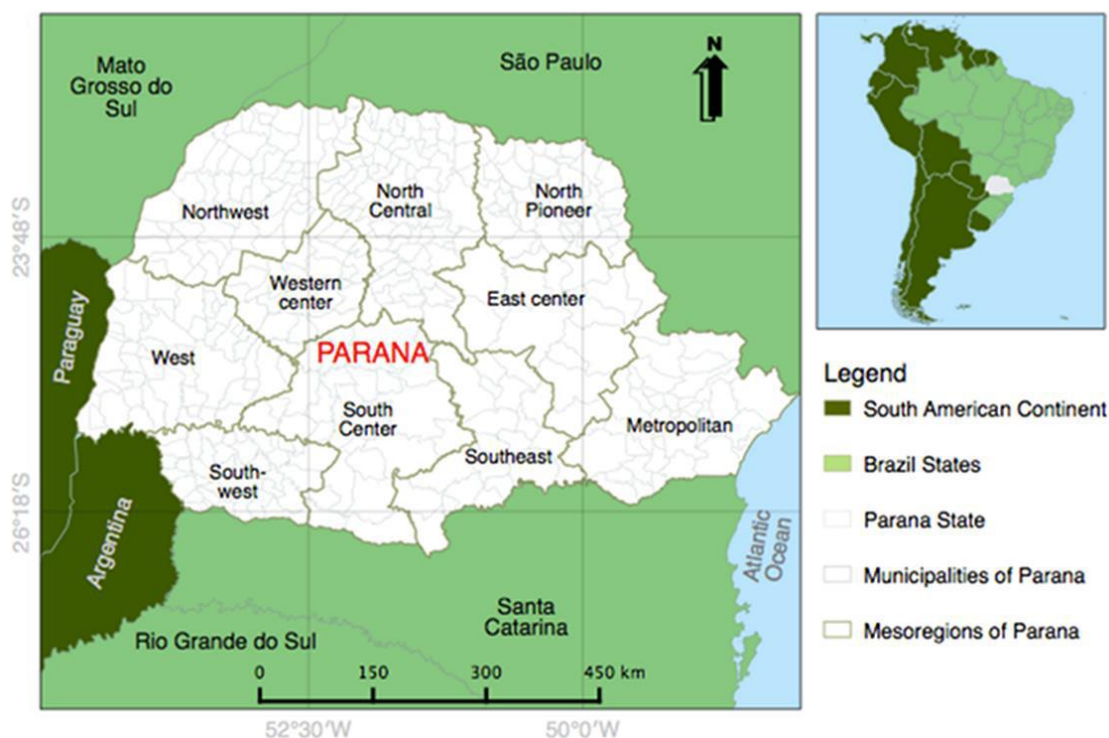

**Table S1** Data sources for analysis

| Variable                 | Source                                           | Type of data                                                                                                                                                                                                                                                                     | Level        | Range     |
|--------------------------|--------------------------------------------------|----------------------------------------------------------------------------------------------------------------------------------------------------------------------------------------------------------------------------------------------------------------------------------|--------------|-----------|
| Suicide death rate       | Mortality Information System                     | Deaths coded in the International Classification of Diseases and Related Health Problems-10 as intentional self-harm (X60-X84).                                                                                                                                                  | Municipality | 1998-2002 |
| Socioeconomic indicators | Brazilian Institute of Geographic and Statistics | <b>Education:</b> Rate of individuals with $\geq 8$ years of schooling;<br><b>Income:</b> Average household income per capita;<br><b>Unemployment:</b> Unemployment rate;<br><b>Informality:</b> Informal employment rate;<br>Human development index;<br>Gross domestic product | Municipality | 2008-2012 |

**Table S2** Data sets created by combining original data

| Seq | Year | CLB | HDI | AGE     | Seq | Year | CLB | HDI | AGE     |
|-----|------|-----|-----|---------|-----|------|-----|-----|---------|
| 1   | 2000 | Yes | Yes | Average | 17  | 2010 | Yes | Yes | Average |
| 2   | 2000 | Yes | Yes | 15-19   | 18  | 2010 | Yes | Yes | 15-19   |
| 3   | 2000 | Yes | Yes | 20-24   | 19  | 2010 | Yes | Yes | 20-24   |
| 4   | 2000 | Yes | Yes | 25-29   | 20  | 2010 | Yes | Yes | 25-29   |
| 5   | 2000 | Yes | No  | Average | 21  | 2010 | Yes | No  | Average |
| 6   | 2000 | Yes | No  | 15-19   | 22  | 2010 | Yes | No  | 15-19   |
| 7   | 2000 | Yes | No  | 20-24   | 23  | 2010 | Yes | No  | 20-24   |
| 8   | 2000 | Yes | No  | 25-29   | 24  | 2010 | Yes | No  | 25-29   |
| 9   | 2000 | No  | Yes | Average | 25  | 2010 | No  | Yes | Average |
| 10  | 2000 | No  | Yes | 15-19   | 26  | 2010 | No  | Yes | 15-19   |
| 11  | 2000 | No  | Yes | 20-24   | 27  | 2010 | No  | Yes | 20-24   |
| 12  | 2000 | No  | Yes | 25-29   | 28  | 2010 | No  | Yes | 25-29   |
| 13  | 2000 | No  | No  | Average | 29  | 2010 | No  | No  | Average |
| 14  | 2000 | No  | No  | 15-19   | 30  | 2010 | No  | No  | 15-19   |
| 15  | 2000 | No  | No  | 20-24   | 31  | 2010 | No  | No  | 20-24   |
| 16  | 2000 | No  | No  | 25-29   | 32  | 2010 | No  | No  | 25-29   |
